# Supplementary material
Source: PubMed Central journal article supplement (PMC8311466)
Supplement: NIHMS1720568-supplement-supinfo.pdf [file NIHMS1720568-supplement-supinfo.pdf]

**Supplementary Table. Neuropsychological Test Scores (Baseline) by Treatment Group**

|                                          | <b>Total Sample<br/>(n = 101)</b> |      | <b>Occupational<br/>Therapy<br/>(n = 50)</b> |      | <b>Diabetes<br/>Education<br/>(n = 51)</b> |      |
|------------------------------------------|-----------------------------------|------|----------------------------------------------|------|--------------------------------------------|------|
| Wide Range Achievement Test <sup>1</sup> |                                   |      |                                              |      |                                            |      |
| (mean, SD)                               | 24.0                              | 7.5  | 23.7                                         | 7.7  | 24.3                                       | 7.5  |
| Mini Mental State Exam <sup>2</sup>      |                                   |      |                                              |      |                                            |      |
| (mean, SD)                               | 25.4                              | 2.6  | 25.7                                         | 2.8  | 25.2                                       | 2.4  |
| Digit Symbol Substitution <sup>3</sup>   |                                   |      |                                              |      |                                            |      |
| (mean, SD)                               | 33.0                              | 13.4 | 35.0                                         | 13.6 | 31.0                                       | 13.2 |
| Trail Making Test-Part A <sup>4</sup>    |                                   |      |                                              |      |                                            |      |
| (mean, SD)                               | 67.5                              | 32.4 | 67.1                                         | 35.0 | 67.9                                       | 30.1 |
| Trail Making Test-Part B <sup>5</sup>    |                                   |      |                                              |      |                                            |      |
| (mean, SD)                               | 217.8                             | 80.5 | 215.3                                        | 79.2 | 220.1                                      | 82.5 |
| Logical Memory Immediate <sup>6</sup>    |                                   |      |                                              |      |                                            |      |
| (mean, SD)                               | 8.6                               | 2.9  | 8.9                                          | 3.0  | 8.3                                        | 2.9  |
| Logical Memory Delayed <sup>7</sup>      |                                   |      |                                              |      |                                            |      |
| (mean, SD)                               | 6.3                               | 3.2  | 6.6                                          | 3.4  | 6.1                                        | 3.0  |

<sup>1</sup> Range is 0 to 42; higher score indicates greater literacy.

<sup>2</sup> Range is 0 to 30; higher score indicates better global cognition.

<sup>3</sup> Range is 0 to 140; higher score indicates better processing speed.

<sup>4</sup> Range is 0 to 150 seconds; lower score indicates better processing speed.

<sup>5</sup> Range is 0 to 300 seconds; lower score indicates better processing speed.

<sup>6</sup> Range is 0 to 25; higher score indicates better immediate memory.

<sup>7</sup> Range is 0 to 25; higher score indicates better episodic memory.
